# Supplementary material for: MB3P2S10 (M = Rb, Cs): two new alkali metal thioboratephosphates with [B6P4S20] T3-supertetrahedra
Source: Royal Society of Chemistry journal article supplement (doi:10.1039/d3dt01496g), 2023-01-01
Supplement: d3dt01496g1.pdf [file d3dt01496g1.pdf]

## Supporting Information

### **MB<sub>3</sub>P<sub>2</sub>S<sub>10</sub> (M = Rb, Cs): Two New Alkali Metal Thioboratephosphates with [B<sub>6</sub>P<sub>4</sub>S<sub>20</sub>] T3-Supertetrahedra**

Jiazheng Zhou,<sup>‡a</sup> Xin Su,<sup>‡c,d</sup> Ling Luo,<sup>e</sup> Junjie Li<sup>\*b</sup> and Feng Yu<sup>\*a</sup>

*a. Key Laboratory for Green Processing of Chemical Engineering of Xinjiang Bingtuan, School of Chemistry and Chemical Engineering, Shihezi University, Shihezi, 832003, China;*

*b. Research Center for Crystal Materials; CAS Key Laboratory of Functional Materials and Devices for Special Environments, Xinjiang Technical Institute of Physics & Chemistry, CAS, Urumqi 830011, China;*

*c. School of Physical Science and Technology, Yili Normal University, Yining, 835000, China;*

*d. Xinjiang Laboratory of Phase Transitions and Microstructures of Condensed Matter Physics, Yili Normal University, Yining, 835000, China;*

*e. Department of Physics and Electronic Engineering, Xinjiang Key Laboratory for Luminescence Minerals and Optical Functional Materials, Xinjiang Normal University, Urumqi, 830054, China.*

<sup>‡</sup>These authors contributed equally to this work.

\*Corresponding authors (Email: yufeng05@mail.ipc.ac.cn; lijunjie@ms.xjb.ac.cn.)

## Experimental Procedures

**Reagents and Synthesis.** All the raw reagents (RbCl/CsI, B, P, S) with high purities ( $\geq 99.99\%$ ) were commercially purchased by Aladdin Industrial Inc. and were stored in a dry Ar-filled glovebox with limited oxygen and moisture levels below 0.1 ppm. The  $\text{MB}_3\text{P}_2\text{S}_{10}$  (M = Rb, Cs) single crystals for structural determination were prepared by the flux method. The starting materials RbCl/CsI, B, P and S were weighed and loaded into graphite crucibles with the ratio of 1 : 3 : 2 : 10. The silica tubes were sealed with methane-oxygen flame under a high vacuum of  $10^{-3}$  Pa. After that, the sealed tubes were put into a computer-controlled furnaces and heating program setting to  $550\text{ }^\circ\text{C}$  in 20 h, kept at the temperature for 24 h, then the temperature was cooled to room temperature at a rate of  $1\text{ }^\circ\text{C/h}$ . Finally, the colorless single crystals for the title compound were harvest.

**Single-Crystal X-ray Diffraction (XRD).** High-quality transparent single crystals were selected under an optical microscope for collecting the X-ray diffraction data. A Bruker SMART APEX II CCD single crystal X-ray diffractometer using graphite-monochromatized molybdenum  $K\alpha$  radiation ( $\lambda = 0.71073\text{ \AA}$ ) was performed to collect the crystal data at room temperature. After collection, the SADABS program<sup>[1]</sup> was used to perform the multiscan-type absorption correction of the structure data. After that, the XPREP program in the SHELXTL program package was used to determine the space group, and the SHELXT and XL programs were applied to solve and refine the structure data by direct methods and full-matrix least-squares on  $F^2$ .<sup>[2]</sup> Notably, during the structure refinements, a Q peak with a value of 1.58 was closed to the Rb atom. After the split operation, the values of  $R_1$  and  $wR_2$  were decreased from 5.91%, 15.48% to 4.17%, 11.30%, respectively, indicating the Rb atoms are disordered in the structure. Finally, the PLATON program was used to check the possible missing symmetry elements, and no higher symmetry was found.<sup>[3]</sup>

**Energy-Dispersive X-ray Spectroscopy (EDS).** The EDS spectrum and mapping of the title compound were characterized on a field emission scanning electron microscope (FE-SEM, JEOL JSM-7610F Plus, Japan) equipped with an energy-dispersive X-ray spectrometer (Oxford, X-Max 50), which was operated at 5 kV. The energy-disperse X-ray spectroscopy (EDS) analyses were carried out on a single crystal of  $\text{MB}_3\text{P}_2\text{S}_{10}$  (M = Rb, Cs). The EDS spectrum and mapping confirm the existence of Rb/Cs, P and S elements in the crystal

**Raman Spectroscopy.**  $\text{MB}_3\text{P}_2\text{S}_{10}$  (M = Rb, Cs) crystals were put on a transparent glass slide, and then a LABRAM HR Evolution spectrometer equipped with a CCD detector by a 532 nm radiation was applied to investigate the Raman spectrum in the  $4000\text{-}100\text{ cm}^{-1}$  region. The peaks around  $665\text{ cm}^{-1}$  can be thought to  $A_1'$  vibrational modes of  $[\text{BS}_4]$  units, the weak peaks around  $783\text{ cm}^{-1}$  can be thought to  $T_2$  vibrational modes of  $[\text{BS}_4]$  units, The strong peaks around  $220\text{ cm}^{-1}$  can be thought to the  $\nu_2$  and  $\nu_4$  modes result from the symmetric and asymmetric bending vibrations of the  $[\text{PS}_4]$  units, The strong peaks around  $440\text{ cm}^{-1}$  can be assigned to the  $\nu_1$  symmetric stretching mode within the  $[\text{PS}_4]$  units, the weak vibrational around  $548\text{ cm}^{-1}$  originates from the  $\nu_3$  asymmetric stretching of the  $[\text{PS}_4]$  units, and the lowest wavenumbers around  $50$  to  $154\text{ cm}^{-1}$  might be attributed to vibrations involving  $\text{Rb}^+$  cations.

**Theoretical Calculations.** The band structure, total/partial density of states, and optical properties of  $\text{MB}_3\text{P}_2\text{S}_{10}$  (M = Rb, Cs) were calculated by using the plane-wave pseudopotential method implemented in the CASTEP based on the density functional theory (DFT) method. Perdew-Burke-Ernzerhof (PBE) exchange-correlation of Generalized Gradient Approximation (GGA) was applied in the calculation. The interactions between core and electron were described by the norm-conserving pseudopotential (NCP)<sup>[4]</sup>. The Monkhorst–Pack schemes was set as  $0.05\text{ \AA}$  for  $\text{RbB}_3\text{P}_2\text{S}_{10}$  and  $\text{CsB}_3\text{P}_2\text{S}_{10}$ . The valence electrons were set as Rb  $4p^5 5s^1$ , B  $2s^2 2p^1$ , P  $3s^2 3p^3$  and S  $3s^2 3p^4$  for  $\text{RbB}_3\text{P}_2\text{S}_{10}$  and Cs  $5p^5 6s^1$  B  $2s^2 2p^1$ , P  $3s^2 3p^3$  and S  $3s^2 3p^4$  for  $\text{CsB}_3\text{P}_2\text{S}_{10}$ . The kinetic energy cutoffs were set to be  $650\text{ eV}$ . The Heyd-Scuseria-Ernzerhof 06 (HSE06) hybrid functional<sup>[5]</sup> was performed using the PWmat code, which runs on graphics processing unit processors (GPU). The pseudo-potential NCPP-SG15-PBE pseudo-potential and  $50\text{ Ryd}$  plane wave cut-off energy was used in the calculation.

$$E_{XC}^{HSE} = \alpha E_X^{HF,SR}(\mu) + (1 - \alpha) E_X^{PBE,SR}(\mu) + E_X^{PBE,LR}(\mu) + E_C^{PBE}$$

( $\alpha$  : mixing parameter;  $\mu$ : adjustable parameter controlling the short-range of the interaction;  $E_X^{HF,SR}(\mu)$ : short range Hartree-Fock exact exchange functional;  $E_X^{PBE,SR}(\mu)$  and  $E_X^{PBE,LR}(\mu)$ : short and long range components of the PBE exchange functional;  $E_C^{PBE}$  : PBE correlation functional) In HSE06, the parameters are suggested as  $\alpha = 0.25$ .

**Table S1.** Crystal data and structure refinements of Rb<sub>2</sub>B<sub>3</sub>P<sub>2</sub>S<sub>10</sub> and Cs<sub>2</sub>B<sub>3</sub>P<sub>2</sub>S<sub>10</sub>.

| Empirical formula                                                                                                    | Rb <sub>2</sub> B <sub>3</sub> P <sub>2</sub> S <sub>10</sub>                | Cs <sub>2</sub> B <sub>3</sub> P <sub>2</sub> S <sub>10</sub>                |
|----------------------------------------------------------------------------------------------------------------------|------------------------------------------------------------------------------|------------------------------------------------------------------------------|
| Formula weight (Da)                                                                                                  | 500.44                                                                       | 547.88                                                                       |
| Temperature (K)                                                                                                      | 273.15                                                                       | 298.0                                                                        |
| Crystal system, space group                                                                                          | tetragonal, <i>I</i> 4 <sub>1</sub> / <i>a</i>                               | trigonal, <i>R</i> <sup>3</sup> <i>c</i>                                     |
| Unit cell dimensions (Å)                                                                                             | <i>a</i> = <i>b</i> = 13.0688(13)<br><i>c</i> = 16.975(2)                    | <i>a</i> = <i>b</i> = 12.7539(8)<br><i>c</i> = 64.238(9)                     |
| Volume (Å <sup>3</sup> )                                                                                             | 2899.2(7)                                                                    | 9049.2(17)                                                                   |
| <i>Z</i>                                                                                                             | 8                                                                            | 24                                                                           |
| Calculated density (Mg/m <sup>3</sup> )                                                                              | 2.293                                                                        | 2.413                                                                        |
| Completeness (%)                                                                                                     | 100                                                                          | 100                                                                          |
| Absorption coefficient (mm <sup>-1</sup> )                                                                           | 5.039                                                                        | 4.015                                                                        |
| <i>F</i> (000)                                                                                                       | 6240                                                                         | 1936                                                                         |
| 2θ range for data collection/°                                                                                       | 3.804 to 52.86                                                               | 3.934 to 55.128                                                              |
| Index ranges                                                                                                         | -15 ≤ <i>h</i> ≤ 15, -15 ≤ <i>k</i> ≤ 15, -80 ≤ <i>l</i> ≤ 80                | -16 ≤ <i>h</i> ≤ 17, -16 ≤ <i>k</i> ≤ 16, -21 ≤ <i>l</i> ≤ 22                |
| Reflections collected                                                                                                | 41279                                                                        | 23060                                                                        |
| Independent reflections                                                                                              | 2072 [ <i>R</i> <sub>int</sub> = 0.0524, <i>R</i> <sub>sigma</sub> = 0.0157] | 1672 [ <i>R</i> <sub>int</sub> = 0.0743, <i>R</i> <sub>sigma</sub> = 0.0340] |
| Observed reflections [ <i>I</i> > 2σ( <i>I</i> )]                                                                    | 1992                                                                         | 1185                                                                         |
| Data/restraints/parameters                                                                                           | 2072/0/98                                                                    | 1672/0/85                                                                    |
| Absorpt correction type                                                                                              | multi-scan                                                                   | multi-scan                                                                   |
| Goodness-of-fit on <i>F</i> <sup>2</sup>                                                                             | 1.032                                                                        | 1.122                                                                        |
| Final <i>R</i> indices ( <i>F</i> <sub>o</sub> <sup>2</sup> > 2σ( <i>F</i> <sub>o</sub> <sup>2</sup> )) <sup>a</sup> | <i>R</i> <sub>1</sub> = 0.0431, <i>wR</i> <sub>2</sub> = 0.1027              | <i>R</i> <sub>1</sub> = 0.0302, <i>wR</i> <sub>2</sub> = 0.0700              |
| <i>R</i> indices (all data) <sup>a</sup>                                                                             | <i>R</i> <sub>1</sub> = 0.0657, <i>wR</i> <sub>2</sub> = 0.1175              | <i>R</i> <sub>1</sub> = 0.0316, <i>wR</i> <sub>2</sub> = 0.0710              |
| Largest diff. peak and hole (e·Å <sup>-3</sup> )                                                                     | 0.59 and -0.43                                                               | 1.51 and -0.68                                                               |

<sup>a</sup>*R*<sub>1</sub> = Σ||*F*<sub>o</sub>| - |*F*<sub>c</sub>||/Σ|*F*<sub>o</sub>| and *wR*<sub>2</sub> = [Σ*w*(*F*<sub>o</sub><sup>2</sup> - *F*<sub>c</sub><sup>2</sup>)/Σ*wF*<sub>o</sub><sup>4</sup>]<sup>1/2</sup> for *F*<sub>o</sub><sup>2</sup> > 2σ(*F*<sub>o</sub><sup>2</sup>)

**Table S2.** Atomic coordinates, equivalent isotropic displacement parameters ( $\text{\AA}^2 \times 10^3$ ) and BVS of  $\text{Rb}_2\text{B}_3\text{P}_2\text{S}_{10}$ .

| Atoms | x          | y           | z          | $U_{\text{eq}}$ | Wyckoff positions | BVS <sup>[a]</sup>  |
|-------|------------|-------------|------------|-----------------|-------------------|---------------------|
| Rb    | 0          | 1/2         | 1/2        | 119(3)          | 8 <i>d</i>        | 1.08 <sup>[b]</sup> |
| B1    | 1/4        | 1/4         | 0.5037(4)  | 38.2(14)        | 8 <i>e</i>        | 3.10                |
| B2    | 0.4093(3)  | 0.3910(3)   | 0.3750(3)  | 36.2(10)        | 16 <i>f</i>       | 3.07                |
| P1    | 0.26487(9) | 0.30129(10) | 0.50545(7) | 46.3(3)         | 16 <i>f</i>       | 5.46                |
| S1    | 0.60864(9) | 0.22540(10) | 0.57571(7) | 50.6(3)         | 16 <i>f</i>       | 2.28                |
| S2    | 0.52664(7) | 0.37203(8)  | 0.44321(6) | 35.0(2)         | 16 <i>f</i>       | 2.11                |
| S3    | 0.42592(9) | 0.51223(8)  | 0.31518(8) | 47.1(3)         | 16 <i>f</i>       | 2.09                |
| S4    | 0.29276(9) | 0.42752(9)  | 0.43620(7) | 45.4(3)         | 16 <i>f</i>       | 2.07                |

[a] The bond valence sum is calculated by bond-valence theory ( $S = \exp[(R_0 - R)/B]$ , where  $R$  is an empirical constant,  $R_0$  is the length of bond I (in angstroms), and  $B = 0.37$ ).

[b] For the split position,  $S_{\text{Rb}} = S_{\text{Rb(A)}} \times a\% + S_{\text{Rb(B)}} \times b\%$  (where, a % and b % are the occupancies of Rb(A) and Rb(B).)

**Table S3.** Atomic coordinates, equivalent isotropic displacement parameters ( $\text{\AA}^2 \times 10^3$ ) and BVS of  $\text{Cs}_2\text{B}_3\text{P}_2\text{S}_{10}$ .

| Atoms | x          | y          | z          | $U_{\text{eq}}$ | Wyckoff positions | BVS <sup>[a]</sup> |
|-------|------------|------------|------------|-----------------|-------------------|--------------------|
| Cs1   | 2/3        | 1/3        | 1/3        | 42.67(16)       | 6 <i>b</i>        | 1.10               |
| Cs2   | 1/3        | 0.13456(3) | 5/12       | 46.37(12)       | 18 <i>e</i>       | 1.03               |
| B1    | 0.2311(3)  | 0.5072(3)  | 0.37096(6) | 26.1(7)         | 36 <i>f</i>       | 3.05               |
| B2    | 0.3892(3)  | 0.5634(3)  | 0.33177(5) | 23.5(7)         | 36 <i>f</i>       | 3.06               |
| P1    | 0.44768(8) | 0.45544(8) | 0.37121(2) | 31.3(2)         | 36 <i>f</i>       | 5.41               |
| P2    | 1/3        | 2/3        | 0.29135(2) | 29.5(3)         | 12 <i>c</i>       | 5.43               |
| S1    | 0.7121(8)  | 0.44059(8) | 0.38175(2) | 36.3(2)         | 36 <i>f</i>       | 2.14               |
| S2    | 1/3        | 2/3        | 0.38263(2) | 26.4(3)         | 12 <i>c</i>       | 2.19               |
| S3    | 0.27400(8) | 0.39460(8) | 0.38219(2) | 35.4(2)         | 36 <i>f</i>       | 1.99               |
| S4    | 0.22410(6) | 0.49826(6) | 0.34102(2) | 22.58(17)       | 36 <i>f</i>       | 2.23               |
| S5    | 0.44473(8) | 0.45477(7) | 0.33909(2) | 30.94(19)       | 36 <i>f</i>       | 2.11               |
| S6    | 0.39393(8) | 0.55391(8) | 0.30217(2) | 31.22(19)       | 36 <i>f</i>       | 2.12               |
| S7    | 0.51274(9) | 0.35464(9) | 0.38059(2) | 46.8(3)         | 36 <i>f</i>       | 2.05               |
| S8    | 1/3        | 2/3        | 0.26100(2) | 47.6(4)         | 12 <i>c</i>       | 1.97               |

[a] The bond valence sum is calculated by bond-valence theory ( $S_{ij} = \exp[(R_0 - R)/B]$ , where  $R$  is an empirical constant,  $R_0$  is the length of bond  $I$  (in angstroms), and  $B = 0.37$ ).

**Table S4.** Selected bond lengths of Rb<sub>2</sub>B<sub>3</sub>P<sub>2</sub>S<sub>10</sub>.

| Atom             | Atom | Length/Å   | Atom            | Atom             | Length/Å   |
|------------------|------|------------|-----------------|------------------|------------|
| Rb1 <sup>3</sup> | S1   | 3.5028(12) | Rb2             | Rb2 <sup>8</sup> | 1.14(5)    |
| Rb1              | S5   | 3.2373(14) | B1              | S1               | 1.901(4)   |
| Rb1 <sup>6</sup> | S5   | 3.4351(16) | B1              | S2               | 1.929(4)   |
| Rb2 <sup>3</sup> | S1   | 3.704(19)  | B2              | S2               | 1.938(5)   |
| Rb2 <sup>4</sup> | S1   | 3.386(17)  | B2 <sup>1</sup> | S2               | 1.934(5)   |
| Rb2 <sup>5</sup> | S3   | 3.46(2)    | B2              | S3               | 1.894(5)   |
| Rb2              | S4   | 3.729(19)  | B2              | S4               | 1.905(5)   |
| Rb2 <sup>6</sup> | S5   | 3.302(12)  | P1 <sup>2</sup> | S1               | 2.0681(17) |
| Rb2 <sup>7</sup> | S5   | 3.653(12)  | P1 <sup>1</sup> | S3               | 2.0609(19) |
| Rb2 <sup>8</sup> | S5   | 3.416(18)  | P1              | S4               | 2.0580(17) |
| Rb2              | S5   | 3.152(15)  | P1              | S5               | 1.9470(17) |

<sup>1</sup>1/4+Y,3/4-X,3/4-Z; <sup>2</sup>1-X,1/2-Y,+Z; <sup>3</sup>1/4+Y,1/4-X,1/4+Z; <sup>4</sup>5/4-Y,1/4+X,5/4-Z; <sup>5</sup>-1/4+Y,3/4-X,-1/4+Z; <sup>6</sup>3/4-Y,1/4+X,1/4+Z; <sup>7</sup>-1/4+Y,1/4-X,5/4-Z; <sup>8</sup>-X,1-Y,1-Z

**Table S5.** Selected bond lengths of Cs<sub>2</sub>B<sub>3</sub>P<sub>2</sub>S<sub>10</sub>.

| Atom | Atom            | Length/Å   | Atom             | Atom             | Length/Å   |
|------|-----------------|------------|------------------|------------------|------------|
| Cs1  | S5 <sup>1</sup> | 3.8641(8)  | Cs2              | S8 <sup>10</sup> | 3.7713(4)  |
| Cs1  | S5              | 3.8641(8)  | Cs2              | S8 <sup>11</sup> | 3.7713(4)  |
| Cs1  | S5 <sup>2</sup> | 3.8640(8)  | B1               | S1               | 1.905(4)   |
| Cs1  | S5 <sup>3</sup> | 3.8641(8)  | B1               | S2               | 1.935(4)   |
| Cs1  | S5 <sup>4</sup> | 3.8641(8)  | B1 <sup>13</sup> | S2               | 1.935(4)   |
| Cs1  | S5 <sup>5</sup> | 3.8641(8)  | B1 <sup>12</sup> | S2               | 1.935(4)   |
| Cs1  | S7 <sup>3</sup> | 3.6987(12) | B1               | S3               | 1.915(4)   |
| Cs1  | S7 <sup>4</sup> | 3.6986(12) | B1               | S4               | 1.926(4)   |
| Cs1  | S7              | 3.6984(12) | B2               | S4               | 1.930(3)   |
| Cs1  | S7 <sup>5</sup> | 3.6987(12) | B2 <sup>12</sup> | S4               | 1.932(3)   |
| Cs1  | S7 <sup>2</sup> | 3.6987(11) | B2               | S5               | 1.904(3)   |
| Cs1  | S7 <sup>1</sup> | 3.6986(11) | B2               | S6               | 1.909(4)   |
| Cs2  | S6 <sup>5</sup> | 3.7892(9)  | S1 <sup>13</sup> | P1               | 2.0729(13) |
| Cs2  | S6 <sup>6</sup> | 3.7890(9)  | S3               | P1               | 2.0706(12) |
| Cs2  | S1 <sup>7</sup> | 3.6520(9)  | S7               | P1               | 1.9419(12) |
| Cs2  | S1 <sup>8</sup> | 3.6521(9)  | P1               | S5               | 2.0640(14) |
| Cs2  | S7              | 3.4729(10) | P2               | S6               | 2.0640(10) |
| Cs2  | S7 <sup>9</sup> | 3.4729(10) | P2               | S8               | 1.949(2)   |

<sup>1</sup>1-Y,+X-Y,+Z; <sup>2</sup>1/3+Y,2/3-X+Y,2/3-Z; <sup>3</sup>4/3-X,2/3-Y,2/3-Z; <sup>4</sup>1+Y-X,1-X,+Z; <sup>5</sup>1/3-Y+X,-1/3+X,2/3-Z; <sup>6</sup>1/3+Y-X,-1/3+Y,1/6+Z; <sup>7</sup>+Y-X,-X,+Z; <sup>8</sup>2/3-Y+X,1/3-Y,5/6-Z; <sup>9</sup>2/3-X,1/3-X+Y,5/6-Z; <sup>10</sup>1/3-X,2/3-Y,2/3-Z; <sup>11</sup>4/3-Y,2/3-X,1/6+Z; <sup>12</sup>+Y-X,1-X,+Z; <sup>13</sup>1-Y,1+X-Y,+Z



**Table S6.** Selected angles (°) of Rb<sub>2</sub>B<sub>3</sub>P<sub>2</sub>S<sub>10</sub>.

| Atom             | Atom | Atom             | Angle/°   | Atom            | Atom | Atom             | Angle/°   |
|------------------|------|------------------|-----------|-----------------|------|------------------|-----------|
| S1 <sup>10</sup> | Rb1  | S1 <sup>11</sup> | 180       | S5 <sup>5</sup> | Rb2  | S1 <sup>11</sup> | 55.2(3)   |
| S5 <sup>12</sup> | Rb1  | S1 <sup>10</sup> | 56.11(3)  | S5              | Rb2  | S1 <sup>10</sup> | 100.1(4)  |
| S5 <sup>8</sup>  | Rb1  | S1 <sup>10</sup> | 83.95(4)  | S5              | Rb2  | S1 <sup>11</sup> | 81.9(4)   |
| S5 <sup>12</sup> | Rb1  | S1 <sup>11</sup> | 123.89(3) | S5              | Rb2  | S3 <sup>7</sup>  | 91.6(6)   |
| S5 <sup>5</sup>  | Rb1  | S1 <sup>11</sup> | 56.11(3)  | S5 <sup>8</sup> | Rb2  | S3 <sup>7</sup>  | 107.4(4)  |
| S5               | Rb1  | S1 <sup>10</sup> | 96.05(4)  | S5 <sup>5</sup> | Rb2  | S3 <sup>7</sup>  | 88.7(4)   |
| S5               | Rb1  | S1 <sup>11</sup> | 83.95(4)  | S5 <sup>5</sup> | Rb2  | S5 <sup>8</sup>  | 63.1(3)   |
| S5 <sup>8</sup>  | Rb1  | S1 <sup>11</sup> | 96.05(4)  | S5              | Rb2  | S5 <sup>8</sup>  | 160.6(7)  |
| S5 <sup>5</sup>  | Rb1  | S1 <sup>10</sup> | 123.89(3) | S5              | Rb2  | S5 <sup>12</sup> | 61.7(2)   |
| S5 <sup>8</sup>  | Rb1  | S5 <sup>12</sup> | 116.51(4) | S5 <sup>8</sup> | Rb2  | S5 <sup>12</sup> | 106.7(5)  |
| S5               | Rb1  | S5 <sup>12</sup> | 63.49(4)  | S5 <sup>5</sup> | Rb2  | S5 <sup>12</sup> | 162.1(8)  |
| S5 <sup>12</sup> | Rb1  | S5 <sup>5</sup>  | 180       | S5              | Rb2  | S5 <sup>5</sup>  | 123.1(5)  |
| S5               | Rb1  | S5 <sup>5</sup>  | 116.51(4) | S2              | B1   | S2 <sup>2</sup>  | 115.6(3)  |
| S5               | Rb1  | S5 <sup>8</sup>  | 180       | S1              | B1   | S2               | 110.33(6) |
| S5 <sup>8</sup>  | Rb1  | S5 <sup>5</sup>  | 63.49(4)  | S1              | B1   | S2 <sup>2</sup>  | 109.72(6) |
| S1 <sup>10</sup> | Rb2  | S4               | 129.2(7)  | S1 <sup>2</sup> | B1   | S2               | 109.72(6) |
| S1 <sup>11</sup> | Rb2  | S4               | 66.5(3)   | S1 <sup>2</sup> | B1   | S2 <sup>2</sup>  | 110.33(6) |
| S1 <sup>10</sup> | Rb2  | S1 <sup>11</sup> | 162.2(7)  | S1 <sup>2</sup> | B1   | S1               | 100.0(3)  |
| S1 <sup>10</sup> | Rb2  | S3 <sup>7</sup>  | 69.9(4)   | S2 <sup>6</sup> | B2   | S2               | 115.2(2)  |
| S1 <sup>10</sup> | Rb2  | S5 <sup>12</sup> | 55.1(2)   | S4              | B2   | S2 <sup>6</sup>  | 110.5(2)  |
| S1 <sup>10</sup> | Rb2  | S5 <sup>8</sup>  | 83.1(4)   | S4              | B2   | S2               | 109.8(2)  |
| S3 <sup>7</sup>  | Rb2  | S4               | 67.1(4)   | S3              | B2   | S2               | 109.7(2)  |
| S3 <sup>7</sup>  | Rb2  | S1 <sup>11</sup> | 127.9(5)  | S3              | B2   | S2 <sup>6</sup>  | 110.5(2)  |
| S3 <sup>7</sup>  | Rb2  | S5 <sup>12</sup> | 108.9(5)  | S3              | B2   | S4               | 100.1(2)  |
| S5 <sup>12</sup> | Rb2  | S4               | 117.6(4)  | S4              | P1   | S1 <sup>2</sup>  | 108.85(8) |
| S5 <sup>8</sup>  | Rb2  | S4               | 134.8(4)  | S4              | P1   | S3 <sup>6</sup>  | 109.60(8) |
| S5 <sup>5</sup>  | Rb2  | S4               | 71.8(3)   | S3 <sup>6</sup> | P1   | S1 <sup>2</sup>  | 109.80(7) |
| S5               | Rb2  | S4               | 56.5(3)   | S5              | P1   | S4               | 110.68(7) |
| S5 <sup>5</sup>  | Rb2  | S1 <sup>10</sup> | 132.5(4)  | S5              | P1   | S1 <sup>2</sup>  | 108.73(8) |
| S5 <sup>12</sup> | Rb2  | S1 <sup>11</sup> | 112.6(5)  | S5              | P1   | S3 <sup>6</sup>  | 109.18(8) |
| S5 <sup>8</sup>  | Rb2  | S1 <sup>11</sup> | 89.4(5)   |                 |      |                  |           |

<sup>1</sup>1/4+Y,3/4-X,3/4-Z; <sup>2</sup>1-X,1/2-Y,+Z; <sup>3</sup>1/4+Y,1/4-X,1/4+Z; <sup>4</sup>5/4-Y,1/4+X,5/4-Z; <sup>5</sup>-1/4+Y,3/4-X,-1/4+Z; <sup>6</sup>3/4-Y,-1/4+X,3/4-Z; <sup>7</sup>3/4-Y,1/4+X,1/4+Z; <sup>8</sup>-X,1-Y,1-Z; <sup>9</sup>-1/4+Y,1/4-X,5/4-Z; <sup>10</sup>-1/4+Y,5/4-X,5/4-Z; <sup>11</sup>1/4-Y,-1/4+X,-1/4+Z; <sup>12</sup>1/4-Y,1/4+X,5/4-Z

**Table S7.** Selected angles (°) of Cs<sub>2</sub>B<sub>3</sub>P<sub>2</sub>S<sub>10</sub>.

| Atom            | Atom | Atom            | Angle/°     | Atom             | Atom | Atom             | Angle/°     |
|-----------------|------|-----------------|-------------|------------------|------|------------------|-------------|
| S5 <sup>1</sup> | Cs1  | S5 <sup>2</sup> | 60.903(4)   | S7 <sup>4</sup>  | Cs1  | S7 <sup>5</sup>  | 120.72(2)   |
| S5 <sup>3</sup> | Cs1  | S5 <sup>4</sup> | 119.098(4)  | S7 <sup>2</sup>  | Cs1  | S7 <sup>1</sup>  | 120.72(2)   |
| S5 <sup>3</sup> | Cs1  | S5              | 60.904(4)   | S7 <sup>2</sup>  | Cs1  | S7 <sup>5</sup>  | 120.72(2)   |
| S5 <sup>1</sup> | Cs1  | S5 <sup>5</sup> | 119.097(5)  | S7 <sup>3</sup>  | Cs1  | S7 <sup>1</sup>  | 120.72(2)   |
| S5 <sup>2</sup> | Cs1  | S5              | 180         | S7 <sup>3</sup>  | Cs1  | S7 <sup>4</sup>  | 59.28(2)    |
| S5 <sup>1</sup> | Cs1  | S5 <sup>3</sup> | 60.902(5)   | S7 <sup>4</sup>  | Cs1  | S7 <sup>1</sup>  | 180         |
| S5 <sup>5</sup> | Cs1  | S5 <sup>4</sup> | 60.903(4)   | S7               | Cs1  | S7 <sup>1</sup>  | 59.29(2)    |
| S5 <sup>2</sup> | Cs1  | S5 <sup>3</sup> | 119.095(4)  | S7 <sup>1</sup>  | Cs1  | S7 <sup>5</sup>  | 59.29(2)    |
| S5 <sup>1</sup> | Cs1  | S5              | 119.096(5)  | S7 <sup>3</sup>  | Cs1  | S7 <sup>5</sup>  | 180         |
| S5 <sup>5</sup> | Cs1  | S5 <sup>3</sup> | 180         | S7 <sup>2</sup>  | Cs1  | S7 <sup>3</sup>  | 59.28(2)    |
| S5 <sup>5</sup> | Cs1  | S5              | 119.097(5)  | S7               | Cs1  | S7 <sup>5</sup>  | 59.29(2)    |
| S5 <sup>1</sup> | Cs1  | S5 <sup>4</sup> | 180         | S7 <sup>2</sup>  | Cs1  | S7 <sup>4</sup>  | 59.28(2)    |
| S5 <sup>4</sup> | Cs1  | S5              | 60.905(5)   | S7 <sup>2</sup>  | Cs1  | S7               | 180         |
| S5 <sup>2</sup> | Cs1  | S5 <sup>4</sup> | 119.096(5)  | S6 <sup>6</sup>  | Cs2  | S6 <sup>3</sup>  | 177.68(3)   |
| S5 <sup>2</sup> | Cs1  | S5 <sup>5</sup> | 60.903(5)   | S1 <sup>7</sup>  | Cs2  | S6 <sup>6</sup>  | 61.54(2)    |
| S7 <sup>2</sup> | Cs1  | S5 <sup>1</sup> | 85.52(2)    | S1 <sup>8</sup>  | Cs2  | S6 <sup>3</sup>  | 61.54(2)    |
| S7              | Cs1  | S5              | 50.944(19)  | S1 <sup>8</sup>  | Cs2  | S6 <sup>6</sup>  | 120.54(2)   |
| S7 <sup>2</sup> | Cs1  | S5 <sup>4</sup> | 94.48(2)    | S1 <sup>7</sup>  | Cs2  | S6 <sup>3</sup>  | 120.55(2)   |
| S7 <sup>3</sup> | Cs1  | S5 <sup>1</sup> | 71.55(2)    | S1 <sup>7</sup>  | Cs2  | S1 <sup>8</sup>  | 77.20(3)    |
| S7 <sup>4</sup> | Cs1  | S5 <sup>3</sup> | 94.48(2)    | S1 <sup>7</sup>  | Cs2  | S8 <sup>9</sup>  | 95.37(2)    |
| S7 <sup>4</sup> | Cs1  | S5 <sup>1</sup> | 129.051(19) | S1 <sup>7</sup>  | Cs2  | S8 <sup>10</sup> | 94.37(2)    |
| S7 <sup>1</sup> | Cs1  | S5 <sup>4</sup> | 129.056(19) | S1 <sup>8</sup>  | Cs2  | S8 <sup>9</sup>  | 94.36(2)    |
| S7              | Cs1  | S5 <sup>1</sup> | 94.48(2)    | S1 <sup>8</sup>  | Cs2  | S8 <sup>10</sup> | 95.37(2)    |
| S7 <sup>2</sup> | Cs1  | S5 <sup>3</sup> | 108.45(2)   | S7 <sup>11</sup> | Cs2  | S6 <sup>6</sup>  | 70.51(2)    |
| S7 <sup>1</sup> | Cs1  | S5 <sup>1</sup> | 50.946(19)  | S7 <sup>11</sup> | Cs2  | S6 <sup>3</sup>  | 108.32(3)   |
| S7 <sup>1</sup> | Cs1  | S5 <sup>3</sup> | 85.52(2)    | S7               | Cs2  | S6 <sup>6</sup>  | 108.32(3)   |
| S7 <sup>5</sup> | Cs1  | S5 <sup>1</sup> | 108.45(2)   | S7               | Cs2  | S6 <sup>3</sup>  | 70.50(2)    |
| S7 <sup>4</sup> | Cs1  | S5 <sup>4</sup> | 50.947(19)  | S7 <sup>11</sup> | Cs2  | S1 <sup>7</sup>  | 84.38(3)    |
| S7 <sup>2</sup> | Cs1  | S5 <sup>2</sup> | 50.946(19)  | S7 <sup>11</sup> | Cs2  | S1 <sup>8</sup>  | 147.81(2)   |
| S7 <sup>3</sup> | Cs1  | S5              | 85.52(2)    | S7               | Cs2  | S1 <sup>7</sup>  | 147.81(2)   |
| S7 <sup>3</sup> | Cs1  | S5 <sup>2</sup> | 94.48(2)    | S7               | Cs2  | S1 <sup>8</sup>  | 84.39(3)    |
| S7 <sup>5</sup> | Cs1  | S5              | 94.48(2)    | S7 <sup>11</sup> | Cs2  | S7               | 122.79(4)   |
| S7 <sup>4</sup> | Cs1  | S5 <sup>2</sup> | 108.45(2)   | S7 <sup>11</sup> | Cs2  | S8 <sup>10</sup> | 112.33(3)   |
| S7 <sup>3</sup> | Cs1  | S5 <sup>3</sup> | 50.947(19)  | S7               | Cs2  | S8 <sup>9</sup>  | 112.33(3)   |
| S7              | Cs1  | S5 <sup>2</sup> | 129.057(19) | S7 <sup>11</sup> | Cs2  | S8 <sup>9</sup>  | 61.06(3)    |
| S7              | Cs1  | S5 <sup>3</sup> | 71.55(2)    | S7               | Cs2  | S8 <sup>10</sup> | 61.06(3)    |
| S7 <sup>1</sup> | Cs1  | S5 <sup>2</sup> | 71.55(2)    | S8 <sup>9</sup>  | Cs2  | S6 <sup>3</sup>  | 51.45(3)    |
| S7 <sup>5</sup> | Cs1  | S5 <sup>3</sup> | 129.056(19) | S8 <sup>9</sup>  | Cs2  | S6 <sup>6</sup>  | 128.23(3)   |
| S7 <sup>5</sup> | Cs1  | S5 <sup>2</sup> | 85.52(2)    | S8 <sup>10</sup> | Cs2  | S6 <sup>6</sup>  | 51.45(3)    |
| S7 <sup>3</sup> | Cs1  | S5 <sup>4</sup> | 108.45(2)   | S8 <sup>10</sup> | Cs2  | S6 <sup>3</sup>  | 128.23(3)   |
| S7 <sup>2</sup> | Cs1  | S5 <sup>5</sup> | 71.55(2)    | S8 <sup>9</sup>  | Cs2  | S8 <sup>10</sup> | 167.535(11) |
| S7              | Cs1  | S5 <sup>4</sup> | 85.52(2)    | S4               | B1   | S2               | 115.85(17)  |
| S7 <sup>3</sup> | Cs1  | S5 <sup>5</sup> | 129.051(19) | S1               | B1   | S4               | 109.20(18)  |
| S7 <sup>5</sup> | Cs1  | S5 <sup>4</sup> | 71.55(2)    | S1               | B1   | S2               | 109.66(18)  |
| S7 <sup>4</sup> | Cs1  | S5 <sup>5</sup> | 85.52(2)    | S1               | B1   | S3               | 99.90(16)   |
| S7 <sup>4</sup> | Cs1  | S5              | 71.55(2)    | S3               | B1   | S4               | 110.71(18)  |
| S7              | Cs1  | S5 <sup>5</sup> | 108.45(2)   | S3               | B1   | S2               | 110.33(18)  |
| S7 <sup>1</sup> | Cs1  | S5              | 108.45(2)   | S4               | B2   | S4 <sup>13</sup> | 115.66(17)  |

|                 |     |                 |             |    |    |                  |            |
|-----------------|-----|-----------------|-------------|----|----|------------------|------------|
| S7 <sup>1</sup> | Cs1 | S5 <sup>5</sup> | 94.48(2)    | S6 | B2 | S4 <sup>13</sup> | 110.16(17) |
| S7 <sup>5</sup> | Cs1 | S5 <sup>5</sup> | 50.946(19)  | S6 | B2 | S4               | 110.01(17) |
| S7 <sup>2</sup> | Cs1 | S5              | 129.053(19) | S5 | B2 | S4 <sup>13</sup> | 110.90(17) |
| S7 <sup>4</sup> | Cs1 | S7              | 120.72(2)   | S5 | B2 | S4               | 109.46(16) |
| S7 <sup>3</sup> | Cs1 | S7              | 120.72(3)   | S5 | B2 | S6               | 99.44(16)  |

<sup>1</sup>1-Y,+X-Y,+Z; <sup>2</sup>4/3-X,2/3-Y,2/3-Z; <sup>3</sup>1/3-Y+X,-1/3+X,2/3-Z; <sup>4</sup>1/3+Y,2/3-X+Y,2/3-Z; <sup>5</sup>1+Y-X,1-X,+Z; <sup>6</sup>1/3+Y-X,-1/3+Y,1/6+Z; <sup>7</sup>2/3-Y+X,1/3-Y,5/6-Z; <sup>8</sup>+Y-X,-X,+Z; <sup>9</sup>1/3-X,2/3-Y,2/3-Z; <sup>10</sup>4/3-Y,2/3-X,1/6+Z; <sup>11</sup>2/3-X,1/3-X+Y,5/6-Z; <sup>12</sup>+Y-X,1-X,+Z; <sup>13</sup>1-Y,1+X-Y,+Z; <sup>14</sup>-Y,+X-Y,+Z; <sup>15</sup>1/3-Y+X,2/3+X,2/3-Z

**Table S8.** Anisotropic displacement parameters ( $\text{\AA}^2 \times 10^3$ ) for  $\text{Rb}_2\text{B}_3\text{P}_2\text{S}_{10}$ . The anisotropic displacement factor exponent takes the form:  $-2\pi^2[h^2a^2U_{11}+2hka*b*U_{12}+\dots]$ .

| Atom | $U_{11}$ | $U_{22}$ | $U_{33}$ | $U_{23}$ | $U_{13}$ | $U_{12}$ |
|------|----------|----------|----------|----------|----------|----------|
| Rb1  | 166(9)   | 145(5)   | 46.3(13) | -19(3)   | -35(4)   | 101(5)   |
| Rb2  | 48(8)    | 59(5)    | 36(4)    | 0(2)     | -13(3)   | 8(6)     |
| B1   | 35(3)    | 45(4)    | 35(3)    | 0        | 0        | 12(3)    |
| B2   | 30(2)    | 34(2)    | 44(3)    | -0.2(19) | -3.2(19) | 1.8(18)  |
| P1   | 37.1(6)  | 51.0(7)  | 50.8(7)  | 5.8(6)   | 9.7(5)   | 11.6(5)  |
| S1   | 46.8(7)  | 70.7(8)  | 34.4(6)  | -2.5(5)  | -7.4(5)  | 18.1(6)  |
| S2   | 32.6(5)  | 36.3(5)  | 36.1(5)  | -5.0(4)  | -3.0(4)  | 4.2(4)   |
| S3   | 45.9(6)  | 32.7(5)  | 62.7(8)  | 7.9(5)   | -6.9(5)  | 0.1(4)   |
| S4   | 37.8(6)  | 40.9(6)  | 57.6(7)  | 2.0(5)   | 2.8(5)   | 10.5(4)  |
| S5   | 51.2(8)  | 75.7(10) | 72.4(9)  | 16.8(7)  | 26.4(7)  | 22.6(7)  |

**Table S9.** Anisotropic displacement parameters ( $\text{\AA}^2 \times 10^3$ ) for  $\text{Cs}_2\text{B}_3\text{P}_2\text{S}_{10}$ . The anisotropic displacement factor exponent takes the form:  $-2\pi^2[h^2a^{*2}U_{11}+2hka^*b^*U_{12}+\dots]$ .

| Atom | U11      | U22       | U33      | U23     | U13      | U12       |
|------|----------|-----------|----------|---------|----------|-----------|
| Cs1  | 44.0(2)  | 44.0(2)   | 40.0(3)  | 0       | 0        | 22.01(11) |
| Cs2  | 54.4(2)  | 51.63(18) | 34.0(2)  | 1.97(7) | 3.94(15) | 27.20(11) |
| S4   | 20.1(3)  | 18.8(3)   | 28.3(4)  | -0.4(3) | 1.0(3)   | 9.4(3)    |
| S2   | 27.3(4)  | 27.3(4)   | 24.5(6)  | 0       | 0        | 13.7(2)   |
| S6   | 37.4(4)  | 34.2(4)   | 27.3(4)  | -2.5(3) | 3.4(3)   | 21.9(4)   |
| P2   | 33.1(5)  | 33.1(5)   | 22.4(7)  | 0       | 0        | 16.6(2)   |
| S5   | 32.5(4)  | 28.3(4)   | 39.8(5)  | 2.6(3)  | 3.4(3)   | 21.1(3)   |
| P1   | 29.2(4)  | 28.5(4)   | 40.3(5)  | 8.9(4)  | 0.6(4)   | 17.4(4)   |
| S1   | 30.6(4)  | 32.3(4)   | 44.7(5)  | 12.3(4) | 15.0(4)  | 14.8(4)   |
| S3   | 33.7(4)  | 31.3(4)   | 43.8(5)  | 15.9(4) | 8.8(4)   | 18.3(4)   |
| S7   | 44.3(5)  | 47.8(5)   | 61.9(6)  | 24.0(5) | 7.7(5)   | 33.3(5)   |
| S8   | 60.5(7)  | 60.5(7)   | 21.7(8)  | 0       | 0        | 30.2(3)   |
| B1   | 24.7(17) | 22.9(17)  | 29.5(18) | 6.4(14) | 6.1(14)  | 10.9(14)  |
| B2   | 22.6(16) | 20.4(15)  | 28.7(18) | 1.4(13) | 1.2(13)  | 11.7(13)  |

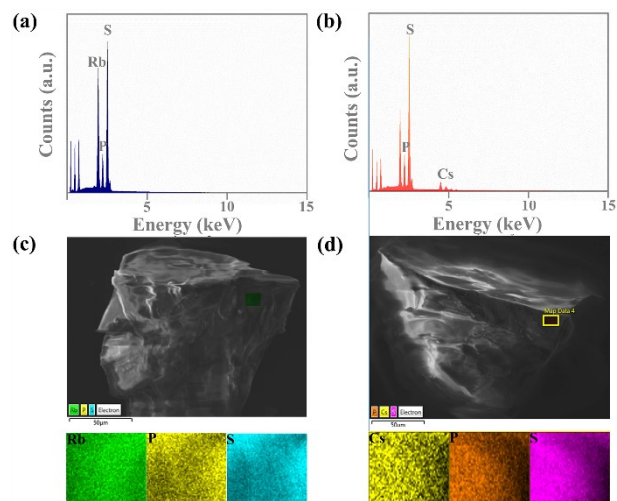

Figure S1. The EDS spectra, SEM images and mappings of  $MB_3P_2S_{10}$  (M = Rb, Cs).

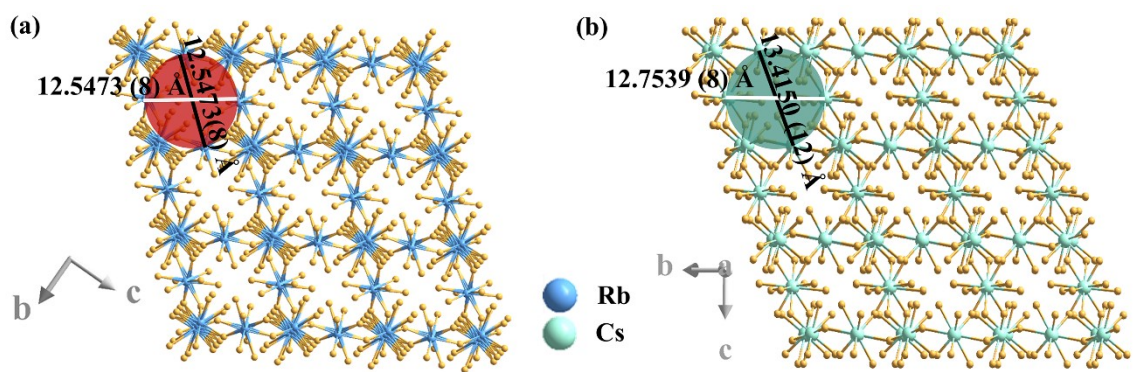

Fig. S2 The Rb-S 3D framework of  $\text{RbB}_3\text{P}_2\text{S}_{10}$  (a) and the Cs-S 3D framework of  $\text{CsB}_3\text{P}_2\text{S}_{10}$  (b) viewed along  $a$  direction.

## References

- [1] L. Haeming, G. M. Sheldrick, SADABS: A Program for Exploiting the Redundancy of Area-Detector X-Ray Data. *Acta Crystallogr. A* **1999**, *55*, 206-206.
- [2] G. M. Sheldrick, A Short History of SHELX. *Acta Crystallogr. A* **2008**, *64*, 112-122.
- [3] A. L. Spek, Single-crystal Structure Validation with the Program PLATON. *J. Appl. Crystallogr.* **2003**, *36*, 7-13.
- [4] a) J. P. Perdew, K. Burke, M. Ernzerhof, Generalized Gradient Approximation Made Simple. *Phys. Rev. Lett.* **1997**, *78*, 1396-1396; b) A. M. Rappe, K. M. Rabe, E. Kaxiras, J. D. Joannopoulos, Optimized Pseudopotentials. *Phys. Rev. B* **1990**, *41*, 1227-1230; c) D. Vanderbilt, Soft Self-Consistent Pseudopotentials in a generalized Eigenvalue Formalism. *Phys. Rev. B* **1990**, *41*, 7892-7895; **2006**, *125*, 224106; d) S. J. Clark, M. D. Segall, C. J. Pickard, P. J. Hasnip, M. J. Probert, K. Refson, M. C. Payne, First Principles Methods Using CASTEP. *Z. Kristallogr.* **2005**, *220*, 567-570.
- [5] a) J. Heyd, J. E. Peralta, G. E. Scuseria, R. L. Martin, Energy Band Gaps and Lattice Parameters Evaluated with the Heyd-Scuseria-Ernzerhof Screened Hybrid Functional. *J. Chem. Phys.* **2005**, *123*, 224106. b) A. V. Krukau, O. A. Vydrov, A. F. Izmaylov, G. E. Scuseria, Influence of the Exchange Screening Parameter on the Performance of Screened Hybrid Functionals. c) J. Heyd, G. E. Scuseria, M. Ernzerhof, Hybrid Functionals Based on a Screened Coulomb Potential. *J. Chem. Phys.* **2003**, *118*, 8207-8215.
